# Supplementary material for: Identification of TLR2 Signalling Mechanisms Which Contribute to Barrett’s and Oesophageal Adenocarcinoma Disease Progression
Source: MDPI journal article supplement (doi:10.3390/cancers13092065), 2021-04-25
Supplement: s1 [file s1]

## Article

# Identification of TLR2 Signalling Mechanisms Which Contribute to Barrett's and Oesophageal Adenocarcinoma Disease Progression

Ewelina Flis <sup>1</sup>, Gillian Barber <sup>1</sup>, Ciara Nulty <sup>1</sup>, Brian Keogh <sup>1</sup>, Peter McGuirk <sup>1</sup>, Akanksha Anand <sup>2</sup>, Jacintha O'Sullivan <sup>3</sup>, Michael Quante <sup>2</sup> and Emma M. Creagh <sup>1,\*</sup>

<sup>1</sup> School of Biochemistry and Immunology, Trinity Biomedical Science Institute (TBSI), Trinity College Dublin, D02 R590 Dublin, Ireland; flise@tcd.ie (E.F.); barberg@tcd.ie (G.B.); nulty@tcd.ie (C.N.); keogh.brian@nuritas.com (B.K.); mcguirk.peter@gmail.com (P.M.)

<sup>2</sup> Department of Internal Medicine, Technical University of Munich, D-80333 Munich, Germany; akanksha.anand@tum.de (A.A.); michael.quante@tum.de (M.Q.)

<sup>3</sup> Department of Surgery, Trinity Translational Medicine Institute, Trinity Centre for Health Sciences, St. James's Hospital, D08 W9RT Dublin, Ireland; osullij4@tcd.ie

\* Correspondence: ECREAGH@tcd.ie; Tel.: +353-1-8962539

**Citation:** Flis, E.; Barber, G.; Nulty, C.; Keogh, B.; McGuirk, P.; Anand, A.; O'Sullivan, J.; Quante, M.; Creagh, E.M. Identification of TLR2 Signalling Mechanisms Which Contribute to Barrett's and Oesophageal Adenocarcinoma Disease Progression. *Cancers* **2021**, *13*, 2065. <https://doi.org/10.3390/cancers13092065>

Academic Editor: Axel Hillmer

Received: 1 April 2021

Accepted: 22 April 2021

Published: 25 April 2021

**Publisher's Note:** MDPI stays neutral with regard to jurisdictional claims in published maps and institutional affiliations.

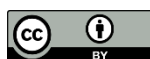

**Copyright:** © 2021 by the authors. Licensee MDPI, Basel, Switzerland. This article is an open access article distributed under the terms and conditions of the Creative Commons Attribution (CC BY) license (<http://creativecommons.org/licenses/by/4.0/>).

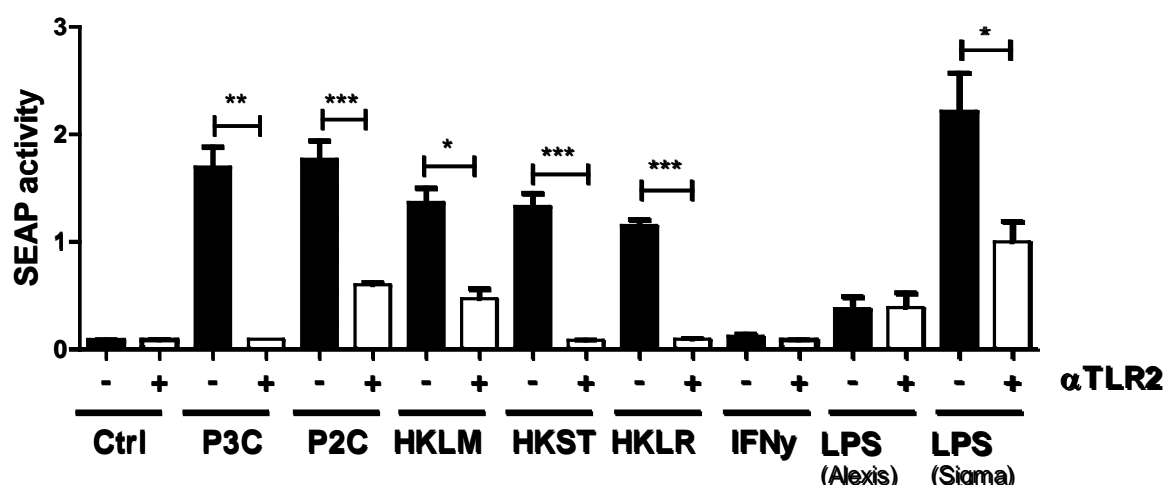

**Figure S1.** Direct TLR2 stimulation of the TLR reporter cell line. THP1-XBlue-CD14, is inhibited by the neutralising antibody,  $\alpha$ TLR2. THP1-XBlue-CD14 were left untreated or pre-treated for 1 h with  $\alpha$ TLR2 (10  $\mu$ g/ml) prior to stimulation with P3C (0.05  $\mu$ g/ml, Invivogen, tlr1-pms); P2C (0.05  $\mu$ g/ml, Invivogen, tlr1-pm2s-1); heat-killed bacteria: *Listeria monocytogenes* (HKLM, 10<sup>7</sup> cells/ml, Invivogen, tlr1-hklm); *Salmonella typhimurium* (HKST, 10<sup>6</sup> cells/ml, Invivogen, tlr1-hkst2); *Lactobacillus rhamnosus* (HKLR, 10<sup>7</sup> cells/ml, Invivogen, tlr1-hklr ); IFN $\gamma$  (40 ng/ml, PeproTech, 300-02 ); LPS from *Escherichia coli*, Serotype R515 (Alexis, TLRGRADE, 1  $\mu$ g/ml, ALX-581-007-L001 ) or LPS from *Escherichia coli* O111:B4 (Sigma, 1  $\mu$ g/ml, L4391) for 24 h. TLR stimulation was assessed by measuring supernatant levels of SEAP using QUANTI-Blue reagent. Values represent the mean  $\pm$  SEM of three independent experiments. Statistical analysis was performed using unpaired 2-tailed Student t-test to compare mean values between  $\alpha$ TLR2 treated and untreated cells, \* $p$  < 0.05; \*\* $p$  < 0.01; \*\*\* $p$  < 0.001.

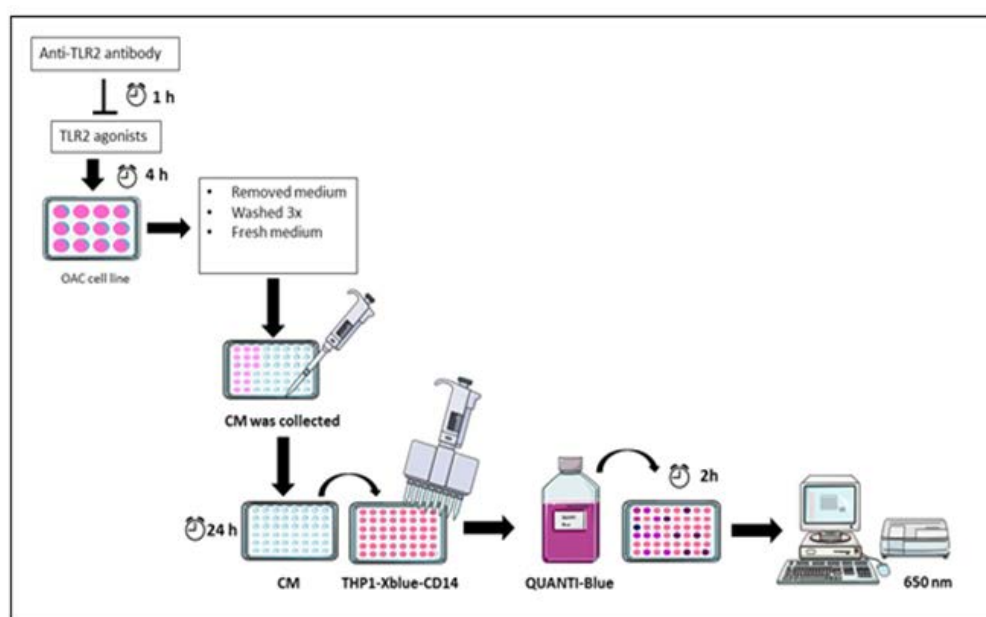

**Figure S2.** Experimental scheme. Oesophageal cell lines (GO, SK-GT 4 and OE33 ) (seeded at 2 $\times$ 10<sup>5</sup>, 1.6 $\times$ 10<sup>5</sup>, 2 $\times$ 10<sup>5</sup> cell/mL, respectively) were left unstimulated or stimulated with  $\alpha$ TLR2 (10  $\mu$ g/mL) for 1 h prior to stimulation with P3C (0.05  $\mu$ g) / P2C (0.05  $\mu$ g) or LPS (1  $\mu$ g/mL) for 4 h Media were removed, cells were washed  $\times$ 3 with PBS and fresh media was added/well. After 24 h, 50  $\mu$ L CM was collected and added to 50  $\mu$ L THP1-XBlue-CD14 (seeded at 4  $\times$  10<sup>6</sup> cells/mL) and incubated for 24 h at 37°C. 40  $\mu$ L resulting supernatant was added to 160  $\mu$ L QUANTI Blue™ and incubated for 2 h at RT in a 96 well plate prior to absorbance measurement at 650 nm.

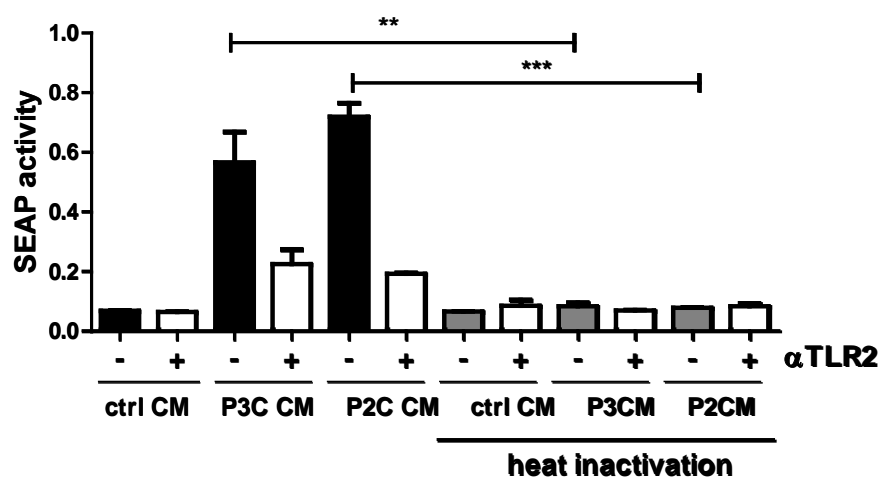

**Figure S3.** Heat-inactivated CM is unable to activate TLRs. CM was collected from unstimulated or  $\alpha$ TLR2 stimulated SK-GT4 (ctrl CM), P2C-pretreated SK-GT 4 (P2C CM) and P3C-pretreated SK-GT4 (P3C CM). Half of the collected CM were heat-inactivated by incubating for 1 h at 75° C. 50  $\mu$ L ctrl CM, P3C CM, P2C CM and heat-inactivated ctrl CM, P3C CM and P2C CM were added to THP1-Xblue-CD14 and incubated for 24 h at 37°C. 40  $\mu$ L supernatant was added to 160  $\mu$ L QUANTI-Blue™ and incubated for 2 h at RT in a 96 well plate prior to absorbance measurement at 650nm. Values represent the mean  $\pm$  SEM of two independent experiments (run in duplicate). Statistical analysis was performed using 2-way ANOVA test to compare mean values between CM and heat-inactivated CM, \*\*  $p < 0.01$ , \*\*\*  $p < 0.001$ .
